# Supplementary material for: Effective clearance of rituximab-resistant tumor cells by breaking the mirror-symmetry of Immunoglobulin G and simultaneous binding to CD55 and CD20
Source: Research Square preprint supplement (doi:10.21203/rs.3.rs-2474854/v1), 2023-01-16
Supplement: Supplementary file 1 [file 8991c39e424558b4cf66cedb.docx]

**Supplementary Information**

**Effective clearance of rituximab-resistant tumor cells by breaking the mirror-symmetry of Immunoglobulin G and simultaneous binding to CD55 and CD20**

Sang Min Lee1,2,*****, Sung-Won Min3,*****, Hyeong Sun Kwon3, Gong-Deuk Bae3, Ji Hae Jung3,

Hye In Park3, Seung Hyeon Lee1, Chung Su Lim4, Byoung Joon Ko5, Ji Chul Lee3,†,

and Sang Taek Jung1,6,7,8,†

*1Department of Biomedical Sciences, Graduate School of Medicine, Korea University, 73 Goryeodae-ro, Seongbuk-gu, Seoul, 02841, Republic of Korea*

*2Department of Applied Chemistry, Kookmin University, 77, Jeongneung-ro, Seongbuk-gu, Seoul, 02707, Republic of Korea*

*3SG Medical, 3-11, Ogeum-ro 13-gil, Songpa-gu, Seoul, 05548, Republic of Korea*

*4New Drug Development Center, Osong Medical Innovation Foundation 123, Cheongju, Chungcheongbuk-do 28160, Republic of Korea*

*5School of Biopharmaceutical and Medical Science, Sungshin Women’s University, 55, Dobonng-ro 76ga-gil, Gangbuk, Seoul 01133, Republic of Korea*

*6BK21 Graduate Program, Department of Biomedical Sciences, Korea University College of Medicine, Seoul, Republic of Korea*

*7Institute of Human Genetics, Korea University College of Medicine, Seoul, 02841, Republic of Korea*

*8Biomedical Research Center, Korea University Anam Hospital, Seoul, 02841, Republic of Korea*

***These authors contributed equally to this work.

†*Correspondence to: Sang Taek Jung (sjung@korea.ac.kr) or Ji Chul Lee (*[*jclee@sgmedical.kr*](mailto:jclee@sgmedical.kr)*)*

**Supplementary Information Tables**

**Supplementary Table 1.** Primers used in the current study. Restriction enzyme sites are underlined.

| **Name** | **Primer nucleotide sequence (5`→3`)** |
| --- | --- |
| **SM#1** | CGCAGCGAGCGCGCACTCCGCCCTGACTCAGCCGTCCT |
| **SM#2** | GCCAGATCCACTGCCTCCTCCACCGCTACCGCCACCACCACTCCCGCCTCCGCCTAGGACGGTCAGGGTTGTCCC |
| **SM#3** | GGAGGAGGCAGTGGATCTGGCGGCTCTGTGACGTTGGACGAGTCCGG |
| **SM#4** | CGGTGGGCATGTGTGAGTTTTGTCTGAGCCGCCGGAGGAGACGATGACTTCGGTCC |
| **SM#5** | CCCCCAGCACCTGAAC |
| **SM#6** | CCACAGGCTGACCTGGTTCTTGGTCAGGACATCCAGATGACTCAATCACCCAGTTCAC |
| **SM#7** | CTGACCAAGAACCAGGTCAGCCTGTGGTGCCTGGTCAAAGGCTTCTATCCCGGTCCGCTTAATCTCCACTTTGGTTCC |
| **SM#8** | GGAGGGGCAAACAACAGATGGC |
| **SM#9** | CGCAGCGA GCGCGC ACTCCGATATTCAAATGACCC |
| **SM#10** | CCACCTCCTCCAGAGCCGCCAGACCCGCTACCACCTCCTCCTGAGCCCCCTCCCCCACTTCCTCCGCCCCCGCACTCTCCCCTGTTGAAGCTCT |
| **SM#11** | GCGGCTCTGGAGGAGGTGGGTCCGGTGGTGGAGGGAGTGGTGGTGGAGGCAGCGGATCTGGCTCTAGCGAGGTTCAATTAGTGGAATCTGGCGG |
| **SM#12** | GGAAGACCGATGGGCCCTTGAAGCTTGCAGAGCTGACC |
| **SM#13** | CGGTGGGCATGTGTGAGTTTTGTC |
| **SM#14** | GGCGCAGCTCAGGCTGACCTGGTTCTTGGTCA |
| **SM#15** | CCGGCTGCCCATTGCTCTCCCACTCCACGGCGATGTCGCTGGGATAGAAGCCTTTGACGGCGCAGCTCAGGCTGA |
| **SM#16** | CACGAGGAAGAAGGAGCCGTCGGAGTCCAGCACGGGAGGTGTGGTCTTGTAGTTGTTCTCCGGCTGCCCATTGCTCT |
| **SM#17** | TCACGGAGCATGAGAAGACGTTCCCCTGCTGCCACCTGCTCTTGTCCACGGTGAGCTTGCTCACGAGGAAGAAGGAGCCGTCG |
| **SM#18** | CGCAATTCGGCCCCCGAGGCCTGATGATTTACCCGGGGACAGGGAGAGGCTCTTCTGCGTGTAGTGGTTGTGCAGAGCCTCATGCATCACGGAGCATGAGAAGACGTTCC |
| **SM#19** | ACTACCGGAACCCCCTGATCCGCCGCCTCCGCTTCCGCCACCGCCGCTCCCACCCCCACCAGAGCCGCCAGACCCGC |
| **SM#20** | CGGATCAGGGGGTTCCGGTAGTGGAGGAGGTGGGTCCGGT |
| **SM#21** | CGCAGCGA GCGCGC ACTCC CAGATTGTCCTGTCTCAGTCTCCTGC |
| **SM#22** | CGGCCGCCGTGCGAGATCTTTTGATTTCCAGTTTAGTTCCGCCG |
| **SM#23** | CAAGTCCAACTGCAACAACCGGG |
| **SM#24** | GGAAGACCGATGGGCCCTTGAAGCTAGCGGCGGAAACCGT TGTGCCAGAG |
| **SM#25** | CGCAGCGAGCGCGCACTCCGACATCCTGCTGACCCAGAGC |
| **SM#26** | ATGAAGACAGATGGTGCGGCCACCGTGCGCTTCAGCTCCAGCTTGGTGCC |
| **SM#27** | GGCACCAAGCTGGAGCTGAAGCGCACGGTGGCCGCACCATCTGTCTTCAT |
| **SM#28** | GCTCTGCTTCAGCTGCACCTGGCTAGAGCCAGATCCGCTGC |
| **SM#29** | GCAGCGGATCTGGCTCTAGCCAGGTGCAGCTGAAGCAGAGC |
| **SM#30** | GGGAAGACCGATGGGCCCTTGGTGCTAGCGGCGGACACGG |
| **SM#31** | CGCAGCGAGCGCGCACTCCCAGATCGTCCTGAGTCAGAGCC |
| **SM#32** | AGAGCCCCAGATCCACTGCCTCCTCCACCGCTACCGCCACCACCACTCCCGCCTCCGCCCTTAATCTCCAATTTAGTTCCCCCGC |
| **SM#33** | GCAGTGGATCTGGCGGCTCTCAGGTCCAGCTCCAACAGCCC |
| **SM#34** | GGTGGGCATGTGTGAGTTTTGTCTGAGCCGCCAGCACTCACCGTCACAGTGGTAC |
| **SM#35** | GACAAAACTCACACATGCCCACC |
| **SM#36** | GTAGCAGGCTTGAGGTCTGGACATATATATGG |
| **SM#37** | TTTACCCGGGGACAGGGAGAG |
| **SM#38** | CTCTCCCTGTCCCCGGGTAAAGGCGGTGGGGGATCAGGGGGTGGAGGCAGTGGTGGTGGAGGGAGCGCCCTGACTCAGCCGTCC |
| **SM#39** | TTTTAGGGTCTAGATTATCAGGAGGAGACGATGACTTCGGTC |

**Supplementary Table 2.** Plasmids used in the present study.

| **Plasmids** | **Characteristics** | **Reference** |
| --- | --- | --- |
| **pMAZ-CD55-scFv-FcKnob** | Ampr, *VL (anti-CD55; 4-1H)-GS linker 20-VH (anti CD55; 4-1H)-CH2-CH3 (Knob mutation; 366W)* gene in pMAZ | This study |
| **pMAZ-HER2-scFab-FcHole** | Ampr, *VL (anti-HER2; Trastuzumab)- Cκ -GS linker 40-VH (anti-HER2; Trastuzumab) -CH1-CH2-CH3 (Hole mutations; 366S,368A,407V)* gene in pMAZ | This study |
| **pMAZ-CD20-scFab-FcHole** | Ampr, *VL (anti-CD20; Rituximab)- Cκ -GS linker 40-VH (anti-CD20; Rituximab) -CH1-CH2-CH3 (Hole mutations; 366S,368A,407V)* gene in pMAZ | This study |
| **pMAZ-EGFR-scFab-FcHole** | Ampr, *VL (anti-EGFR; Cetuximab)- Cκ -GS linker 40-VH (cetuximab) -CH1-CH2-CH3 (Hole mutations; 366S,368A,407V)* gene in pMAZ | This study |
| **pMAZ-CD20-scFv-FcKnob** | Ampr, *VL (Rituximab)-GS linker 20-VH (Rituximab)-CH2-CH3 (Knob mutation; 366W)* gene in pMAZ | This study |
| **pMAZ-CD20-HC-CD55-scFv** | Ampr, *VH-CH1-CH2-CH3 (Rituximab)-GSlinker 15-VL (anti-CD55;4-1H)-GS linker 20-VH (anti-CD55;4-1H)* gene in pMAZ | This study |
| **pMAZ-CD20-LC** | Ampr, *Light chain (VL- Cκ ) (anti-CD20; Rituximab)* gene in pMAZ | This study |
| **pMAZ-CD20-HC** | Ampr, *Heavy chain (VH-CH1-CH2-CH3) (anti-CD20; Rituximab)* gene in pMAZ | This study |
| **pMAZ-CD20-HCknob** | Ampr, *Heavy chain (VH-CH1-CH2-CH3) (Knob mutation; 366W) (anti-CD20; Rituximab)* gene in pMAZ | This study |
| **pMAZ-CD20-HCHole** | Ampr, *Heavy chain (VH-CH1-CH2-CH3) (Hole mutations; 366S,368A,407V)* *(anti-CD20; Rituximab)* gene in pMAZ | This study |
| **pMAZ-CD20-scFv-FcHole** | Ampr, *VL (Rituximab)-GS linker 20-VH (Rituximab)-CH2-CH3 (Hole mutations; 366S,368A,407V)* gene in pMAZ | This study |
| **ST114** | Cmr, pMopac-PelB-Fc-FLAG | (31) |
| **ST470** | Ampr,pMAZ-IgL | (31) |

**Supplementary Information Figure Legends**

**Supplementary Fig. 1** Expression, purification, and RP-analysis of SBU-CD20. **(A).** SDS-PAGE showing the SBU-CD20 purified using Protein A or KappaSelect affinity chromatography resins. Lane 1: nonreduced SBU-CD20 purified using Protein A resins; Lane 2: nonreduced SBU-CD20 purified using KappaSelect resins. **(B** and **C).** RP-HPLC chromatograms for SBU-CD20. SBU-CD20 was analyzed by RP-HPLC after affinity purification using Protein A resins **(B)** and KappaSelect resins **(C)**.

**Supplementary Fig. 2** Comparison between the physicochemical properties of SBU-CD20 and those of control antibodies (rituximab and rituximab-KiH). **(A).** Schematic showing the structure of the control antibodies (rituximab and rituximab-KiH). **(B).** SDS-PAGE showing purified rituximab and rituximab-KiH. Lane 1: reduced rituximab; Lane 2: nonreduced rituximab; Lane 3: reduced rituximab-KiH: Lane 4: nonreduced rituximab-KiH. **(C** and **D).** SEC **(C)** and RP-HPLC **(D)** chromatograms for rituximab, rituximab-KiH, and SBU-CD20.

**Supplementary Fig. 3** Expression and purification of the CD20 epitope (163-187)-fused with streptavidin. **(A).** Map of plasmid pMAZ-CD20(163-187)-Streptavidin-His. (**B).** SDS-PAGE showing the purified CD20(163-187)-Streptavidin-His. Lane 1: nonreduced CD20(163-187)-Streptavidin-His; Lane 2: reduced CD20(163-187)-Streptavidin-His.

**Supplementary Fig. 4** ELISA showing the binding characteristics of SBU-CD20, rituximab, and rituximab-KiH. **(A** and **B).** SBU-CD20, rituximab, and rituximab-KiH binding to CD20 **(A)** and C1q **(B)**.

**Supplementary Fig. 5** Schematic representation of the classical complement pathway. The interaction of C1q with the Fc region of IgG triggers a complement cascade, resulting in the generation of membrane attack complexes (MACs). CD55, which accelerates the decay of C3 convertase (C4bC2a) and C5 convertase (C4b2a3b), prevents the reassembly of their components and inhibits MAC formation and CDC.

**Supplementary Fig. 6** Production and antigen binding characteristics of SBU-CD55×HER2 and SBU-CD55×EGFR. **(A).** SDS-PAGE showing the purified SBU-CD55×HER2 and SBU-CD55×EGFR. Lane 1: reduced SBU-CD55×HER2; Lane 2: nonreduced SBU-CD55×HER2; Lane 3: reduced SBU-CD55×EGFR; Lane 4: nonreduced SBU-CD55×EGFR. **(B** and **C).** ELISA for binding of SBU-CD55×HER2 to CD55 **(B)** and HER2 **(C).** **(D** and **E).** Binding of SBU-CD55×EGFR to CD55 **(D)** and EGFR **(E)**, detected by ELISA.

**Supplementary Fig. 7** Binding characteristics of SBU-CD55×CD20 to human FcγRs and human FcRn. **(A–F).** ELISA for binding of SBU-CD55×CD20, rituximab, and 4-1H to human FcγRI **(A)**, human FcγRIIa-131R **(B)**, human FcγRIIa-131H **(C)**, human FcγRIIb **(D)**, human FcγRIIIa-158V **(E)**, and human FcγRIIIa-158F **(F)**. **(G** and **H).** pH-dependent binding of SBU-CD55×CD20 to human FcRn at pH 7.4 **(G)** and pH 6.0 **(H)**, detected by ELISA. Error bars represent the standard deviation of two replicates.

**Supplementary Fig. 8** Physicochemical properties of SBU-CD55×CD20. **(A** and **B).** The *N*-linked glycan profile **(A)** and thermostability **(B)** of SBU-CD55xCD20 were compared with those of rituximab.

**Supplementary Fig. 9 (A** and **B).** Proposed models illustrating the interaction of C1q with symmetric IgG (rituximab) **(A)** and an asymmetric antibody (SBU-CD20) **(B).**

**Supplementary Fig. 10 (A** and **B).** Schematic depicting antibodies that bind to cellular membrane–bound antigens when a combination of two monoclonal antibodies (rituximab and 4-1H) **(A)** and SBU-CD55xCD20 **(B)** are administered.

**Supplementary Fig. 1
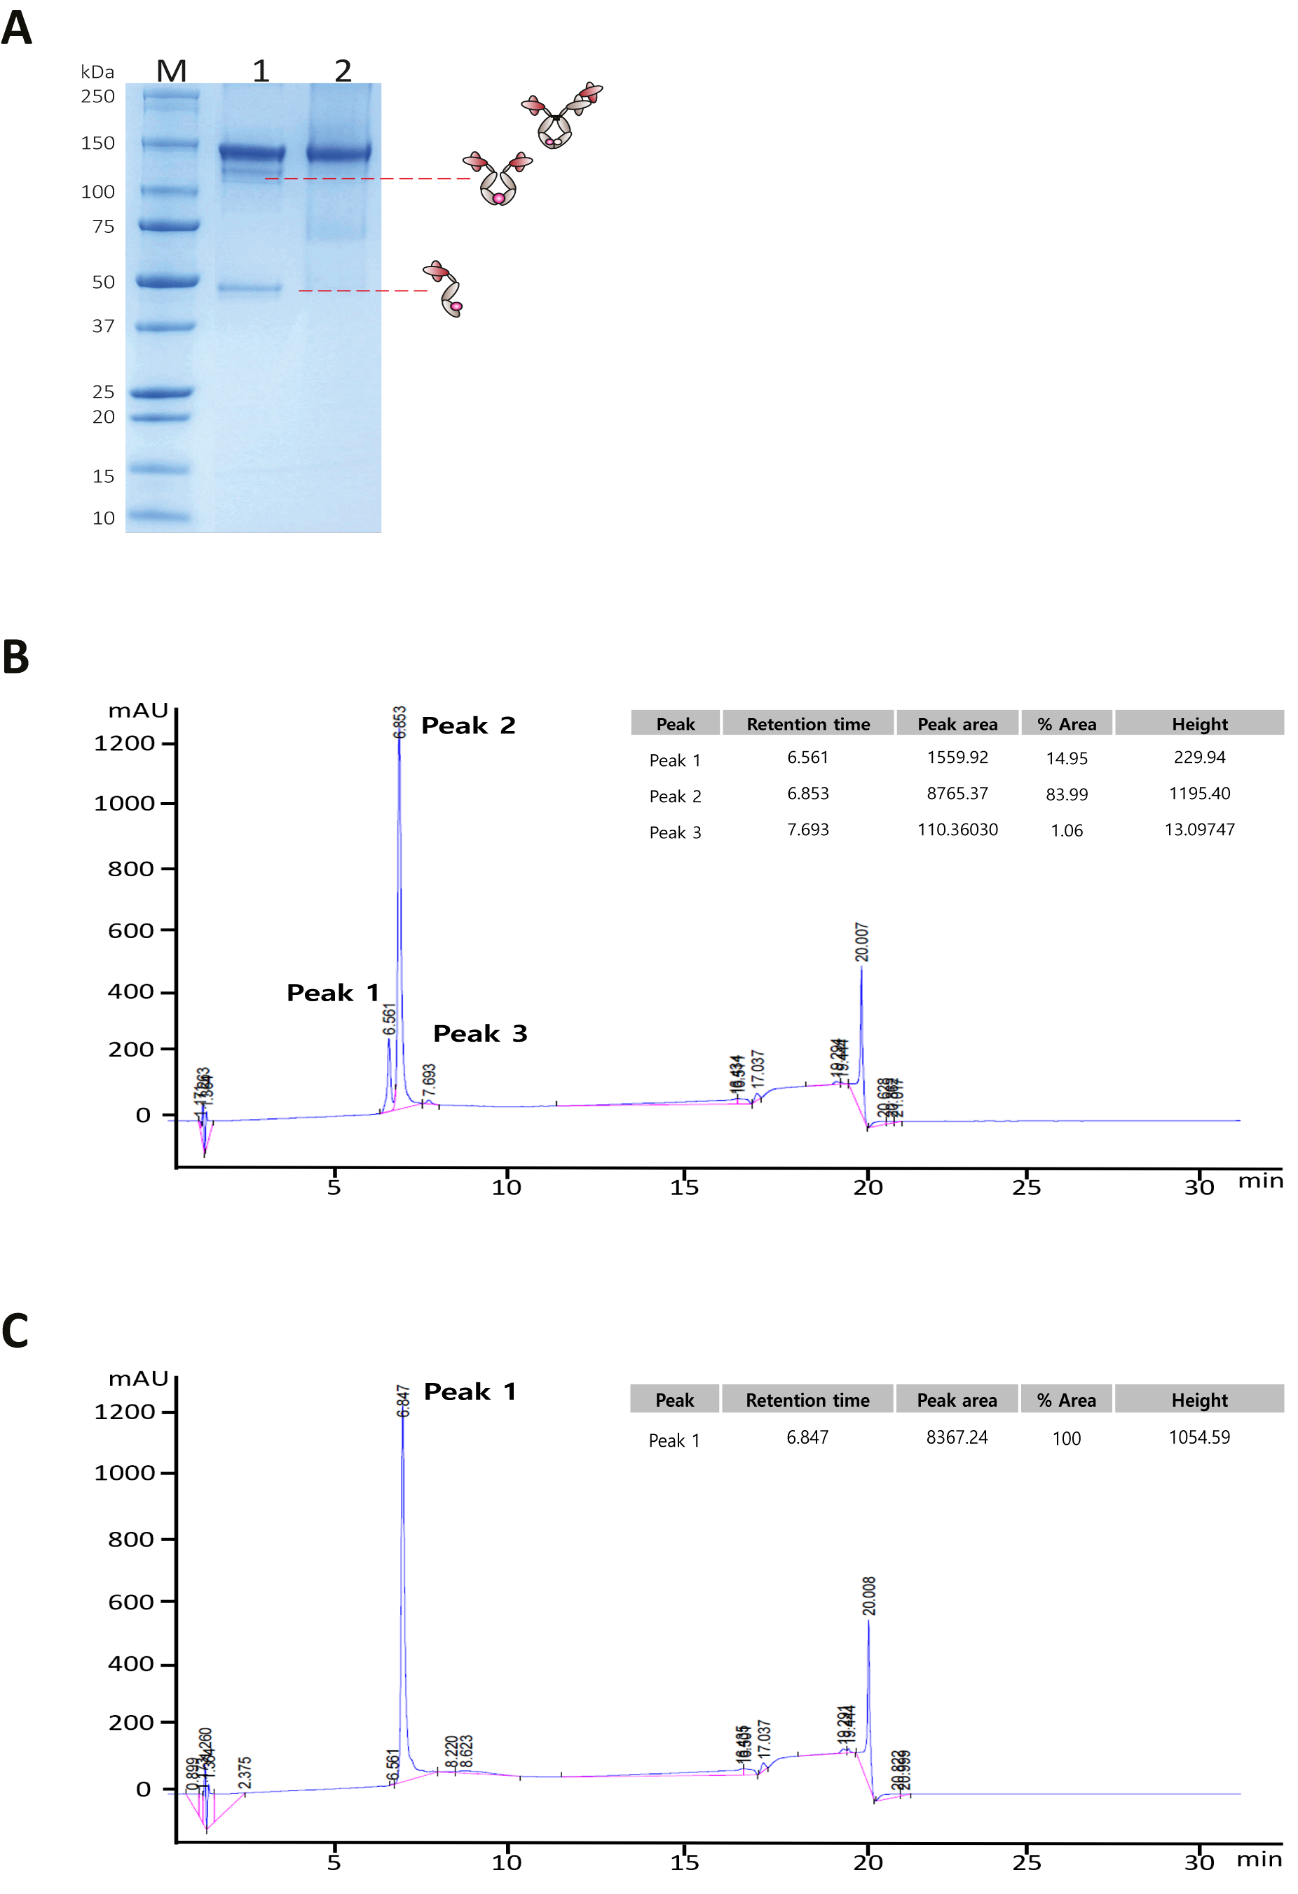
**

**Supplementary Fig. 2
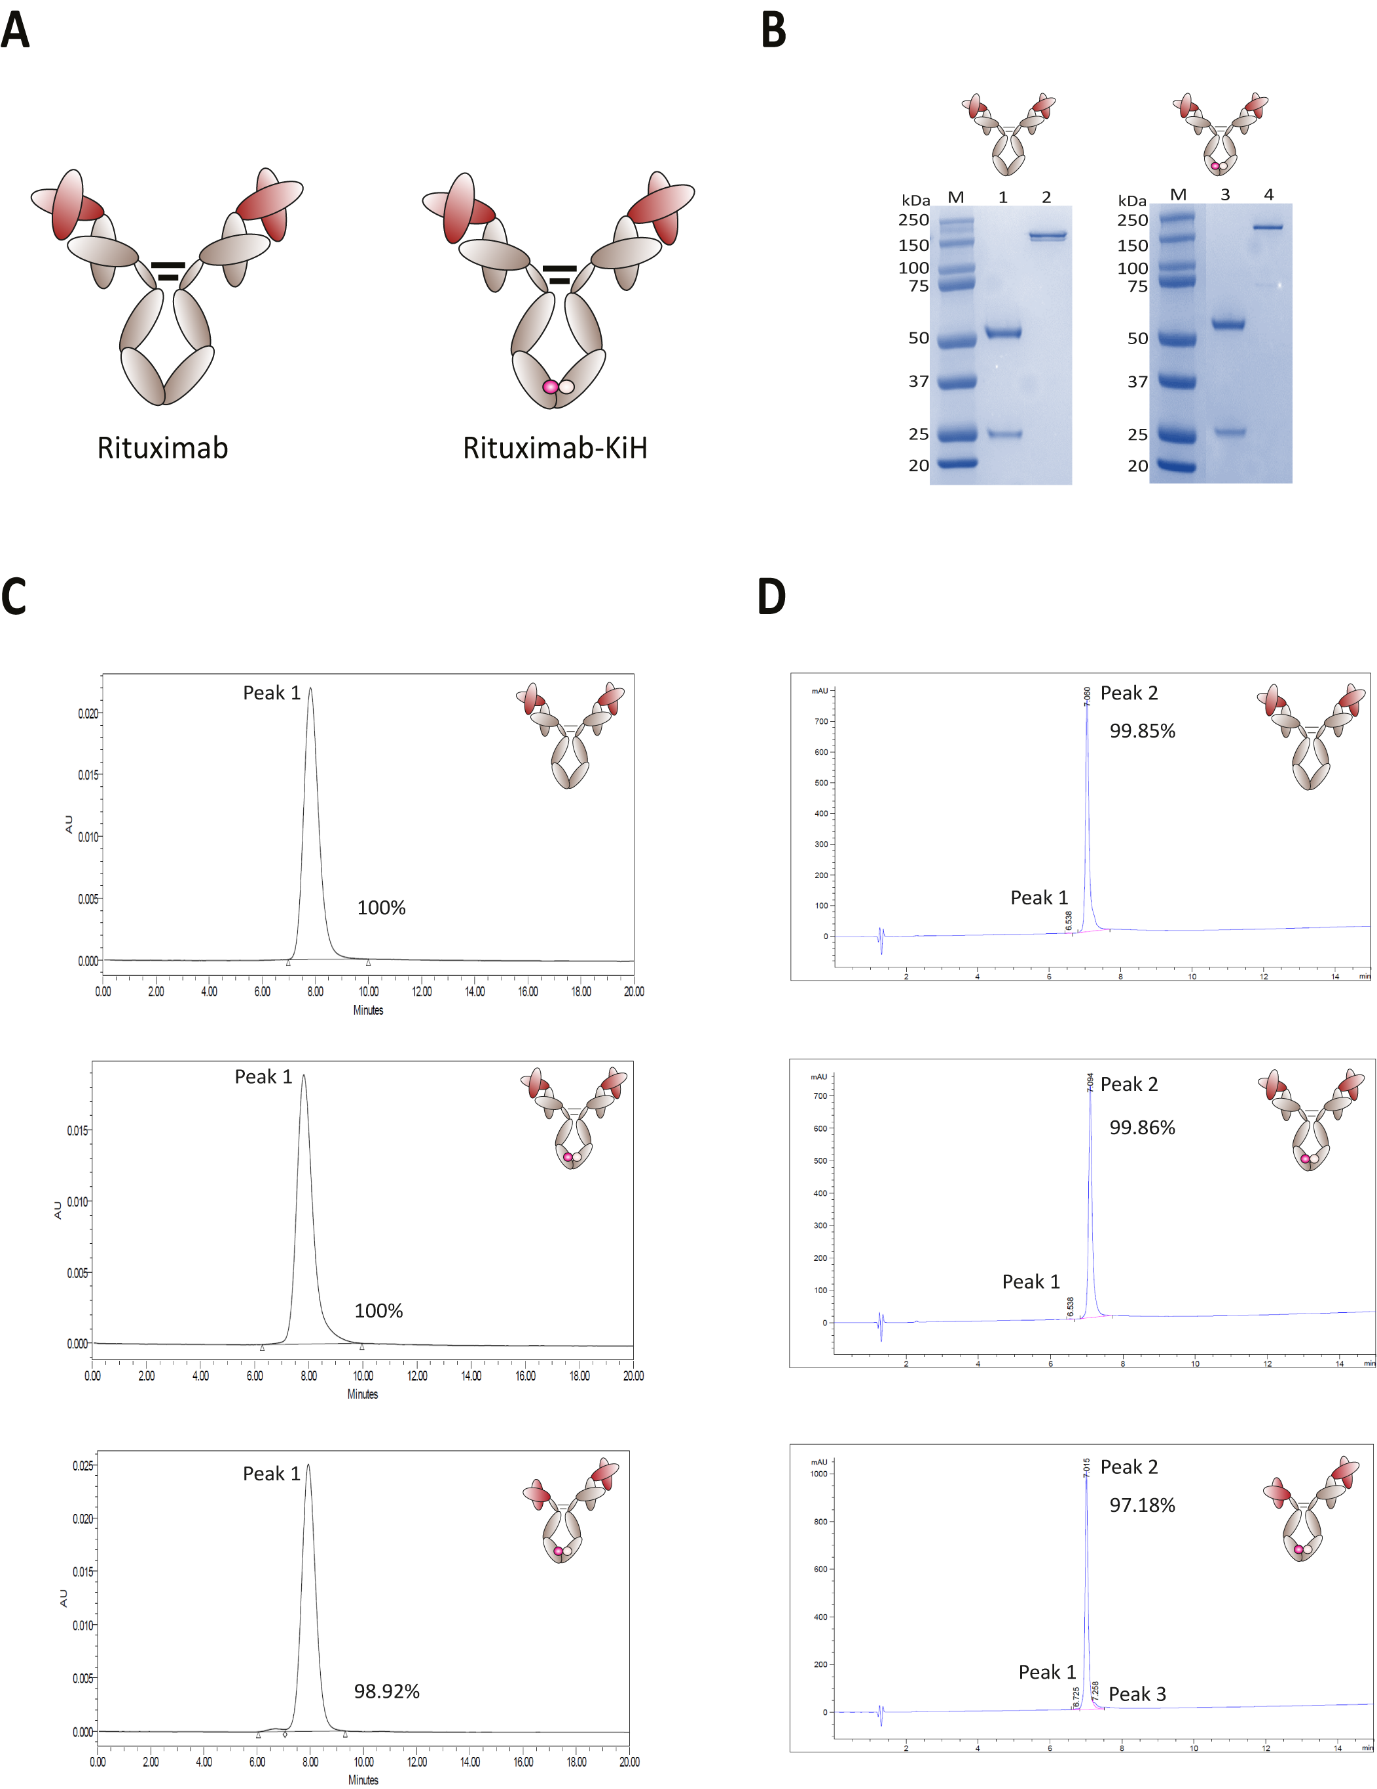
**

**Supplementary Fig. 3**

**
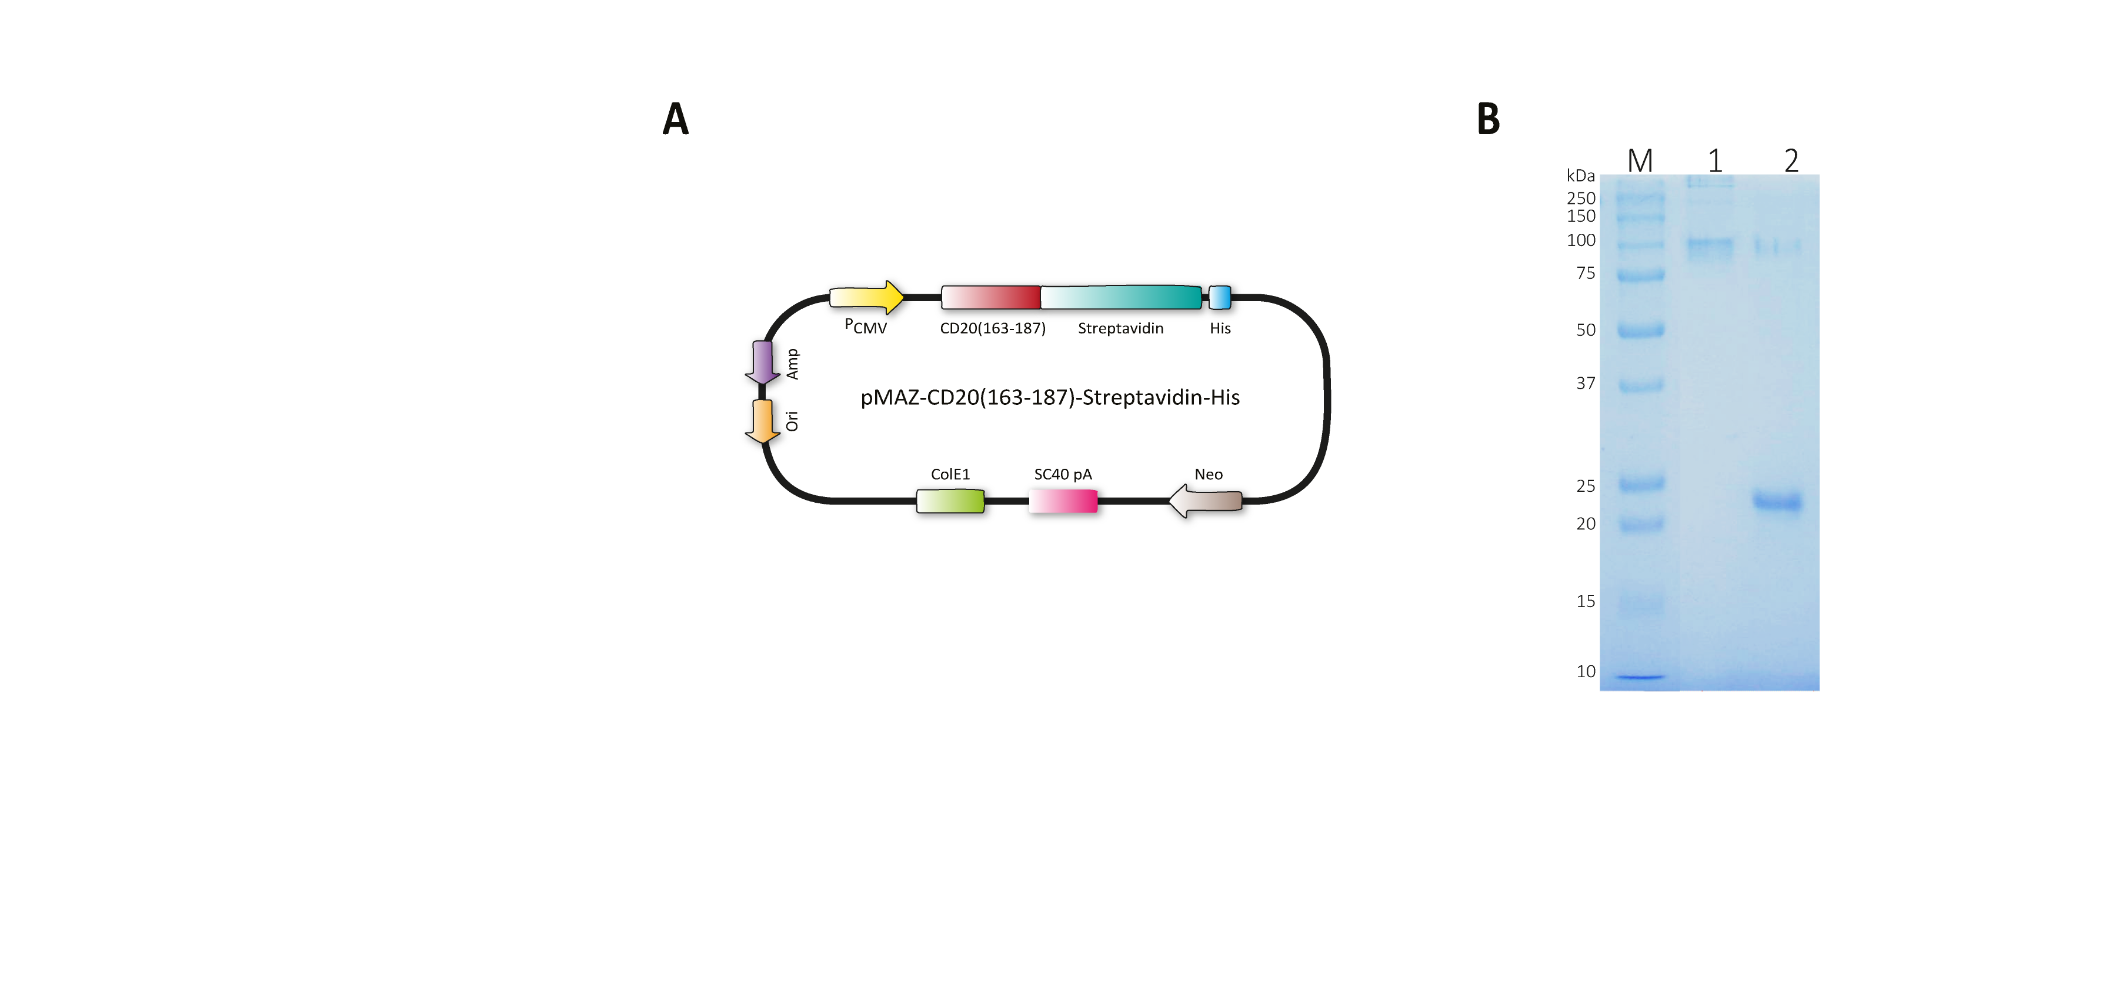
**

**Supplementary Fig. 4
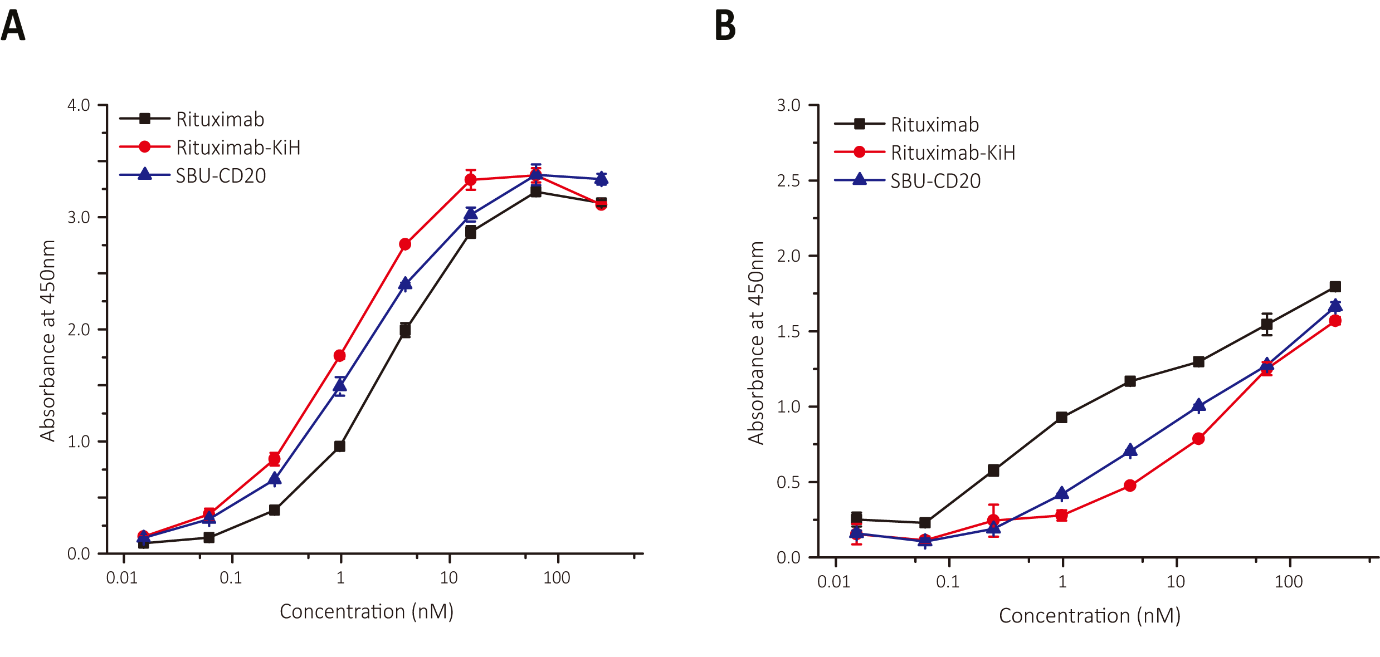
**

**Supplementary Fig. 5
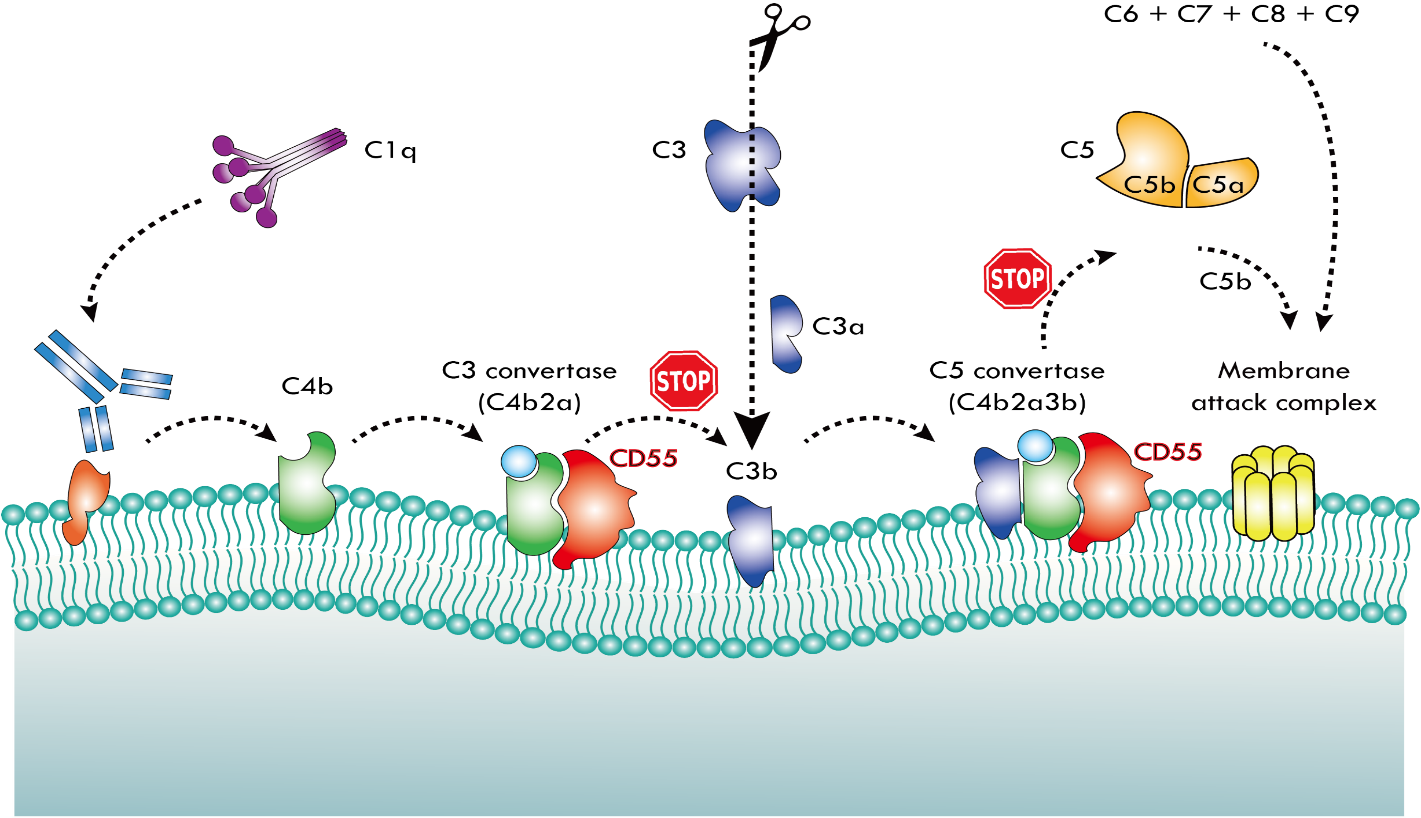
**

**Supplementary Fig. 6**

**
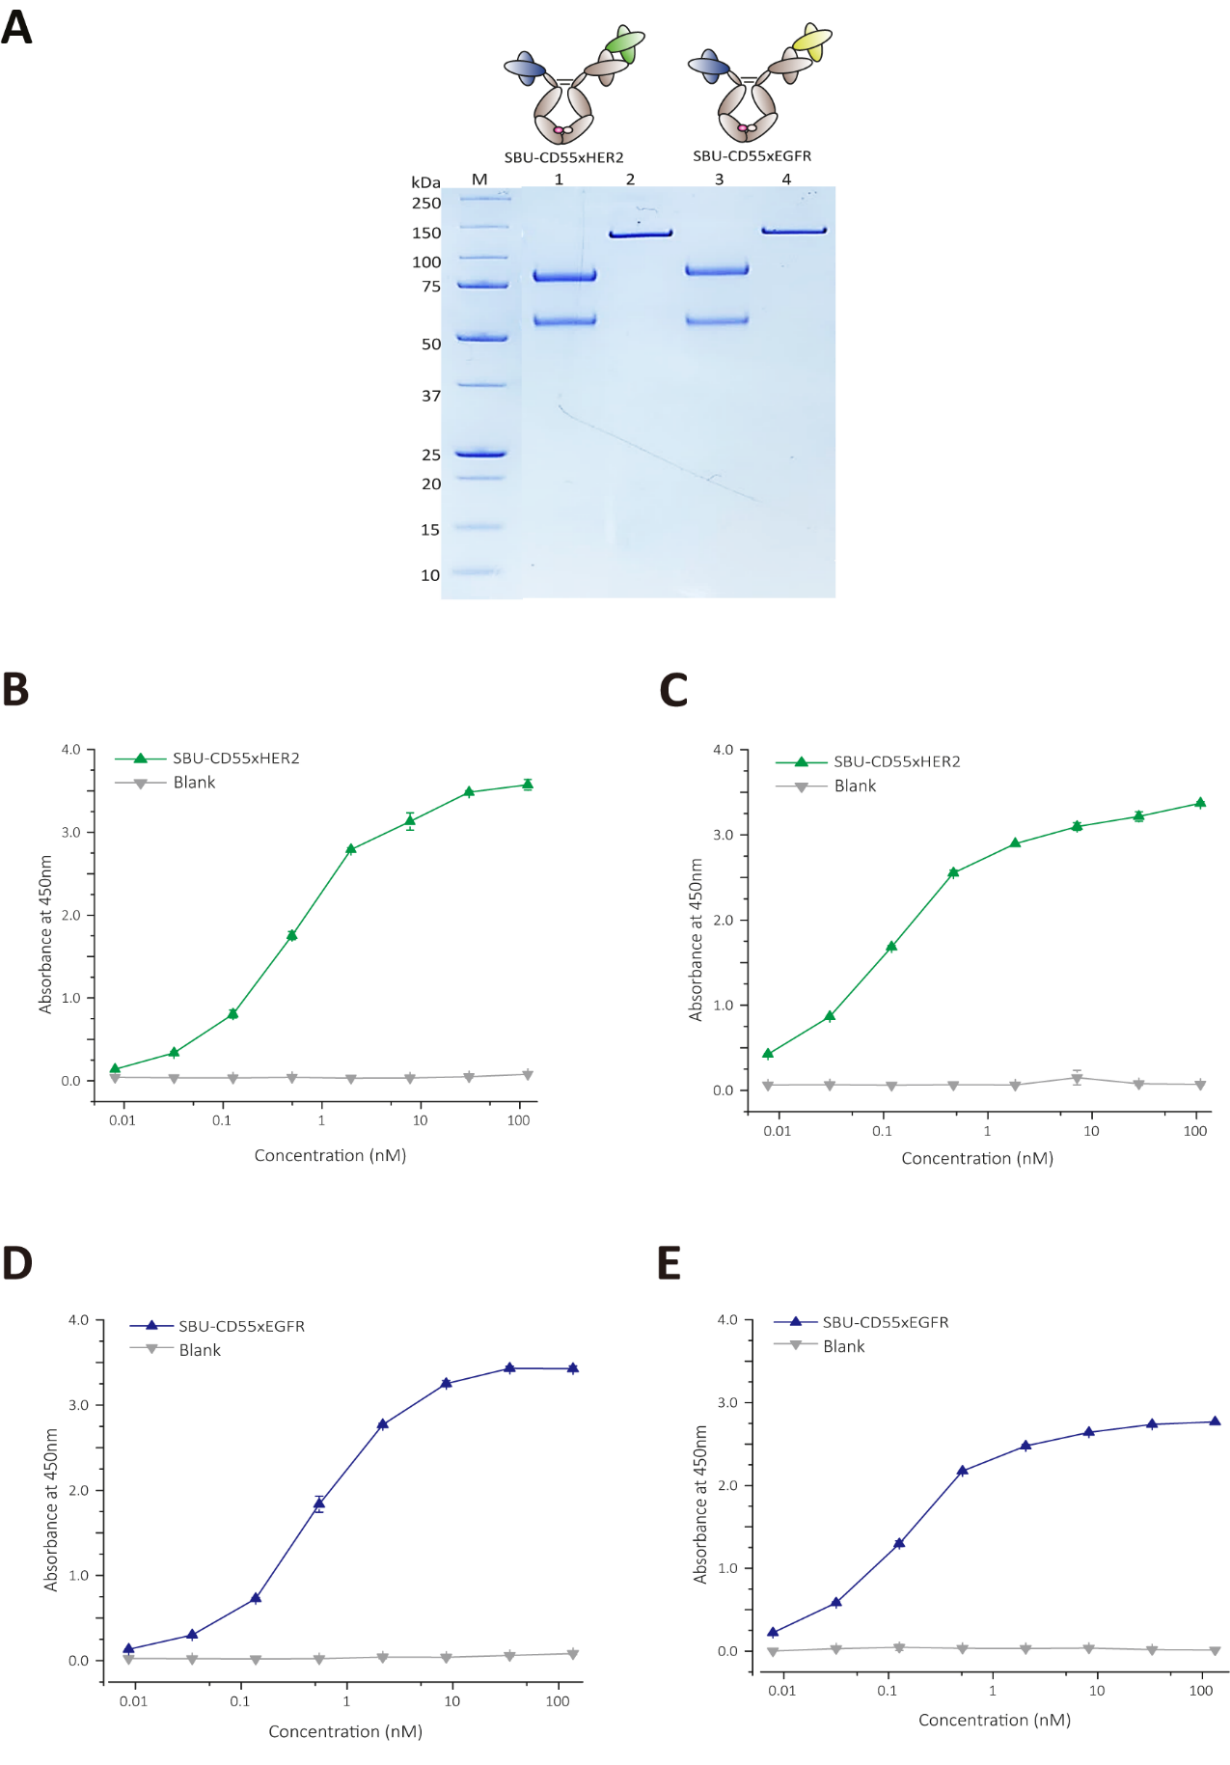
**

**Supplementary Fig. 7**

**
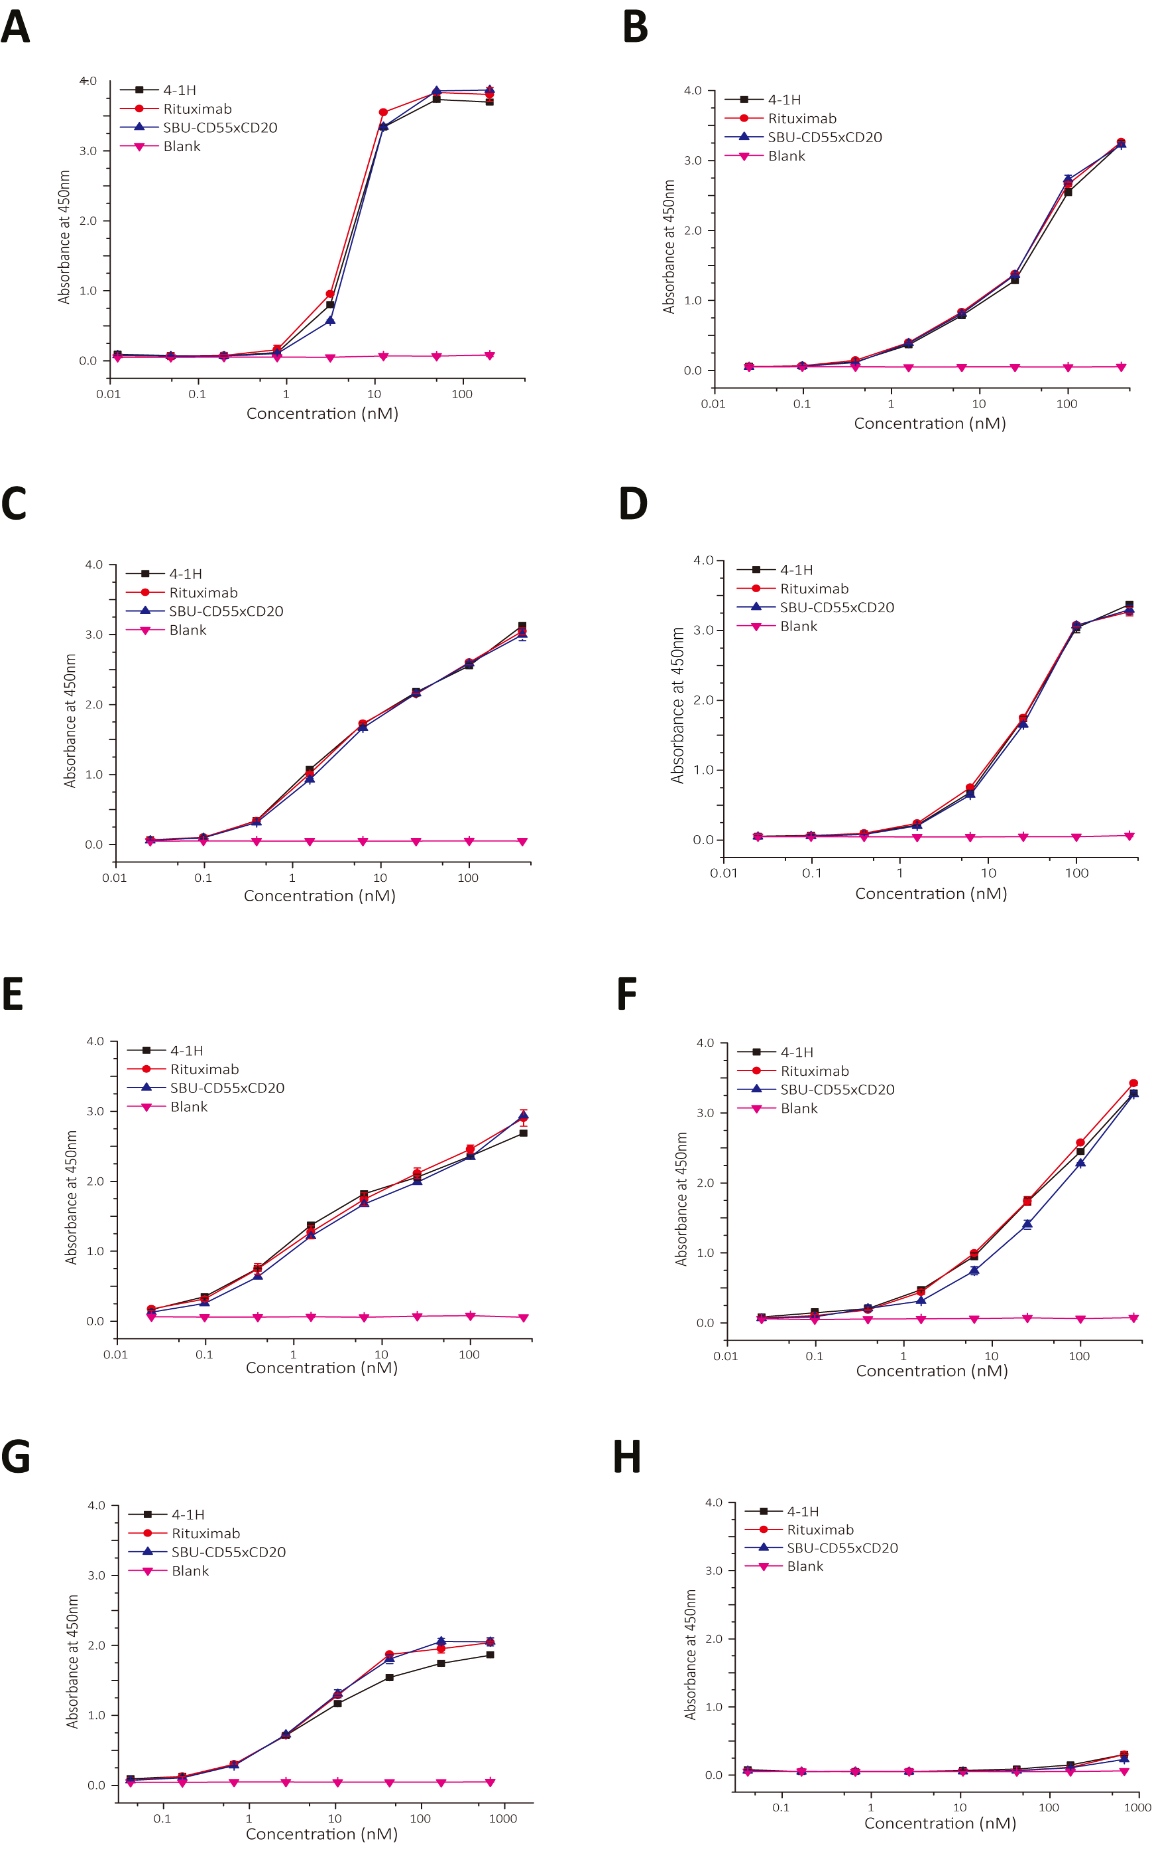
**

**Supplementary Fig. 8**


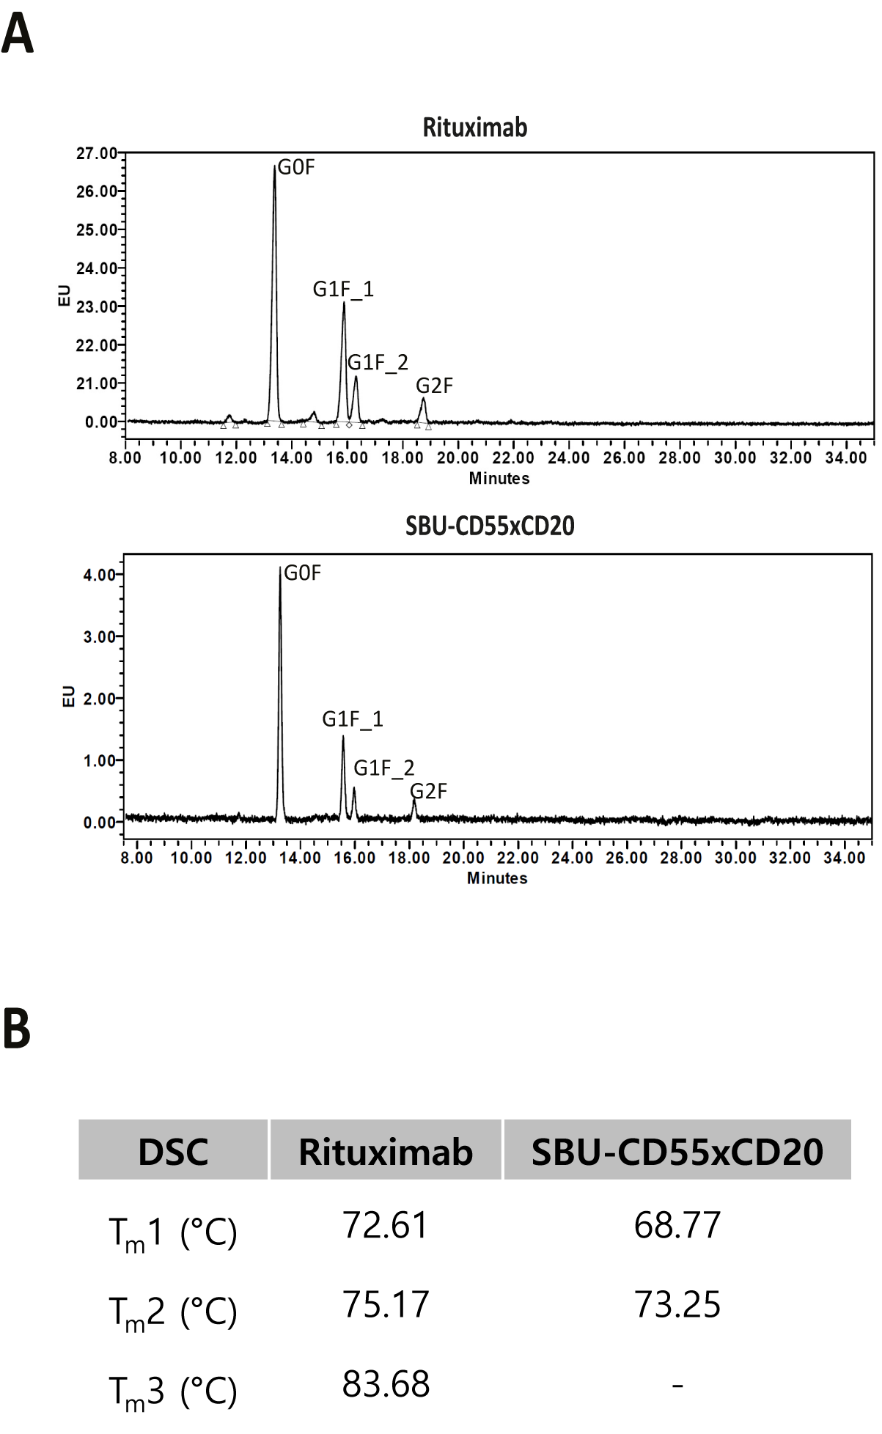


**Supplementary Fig. 9**


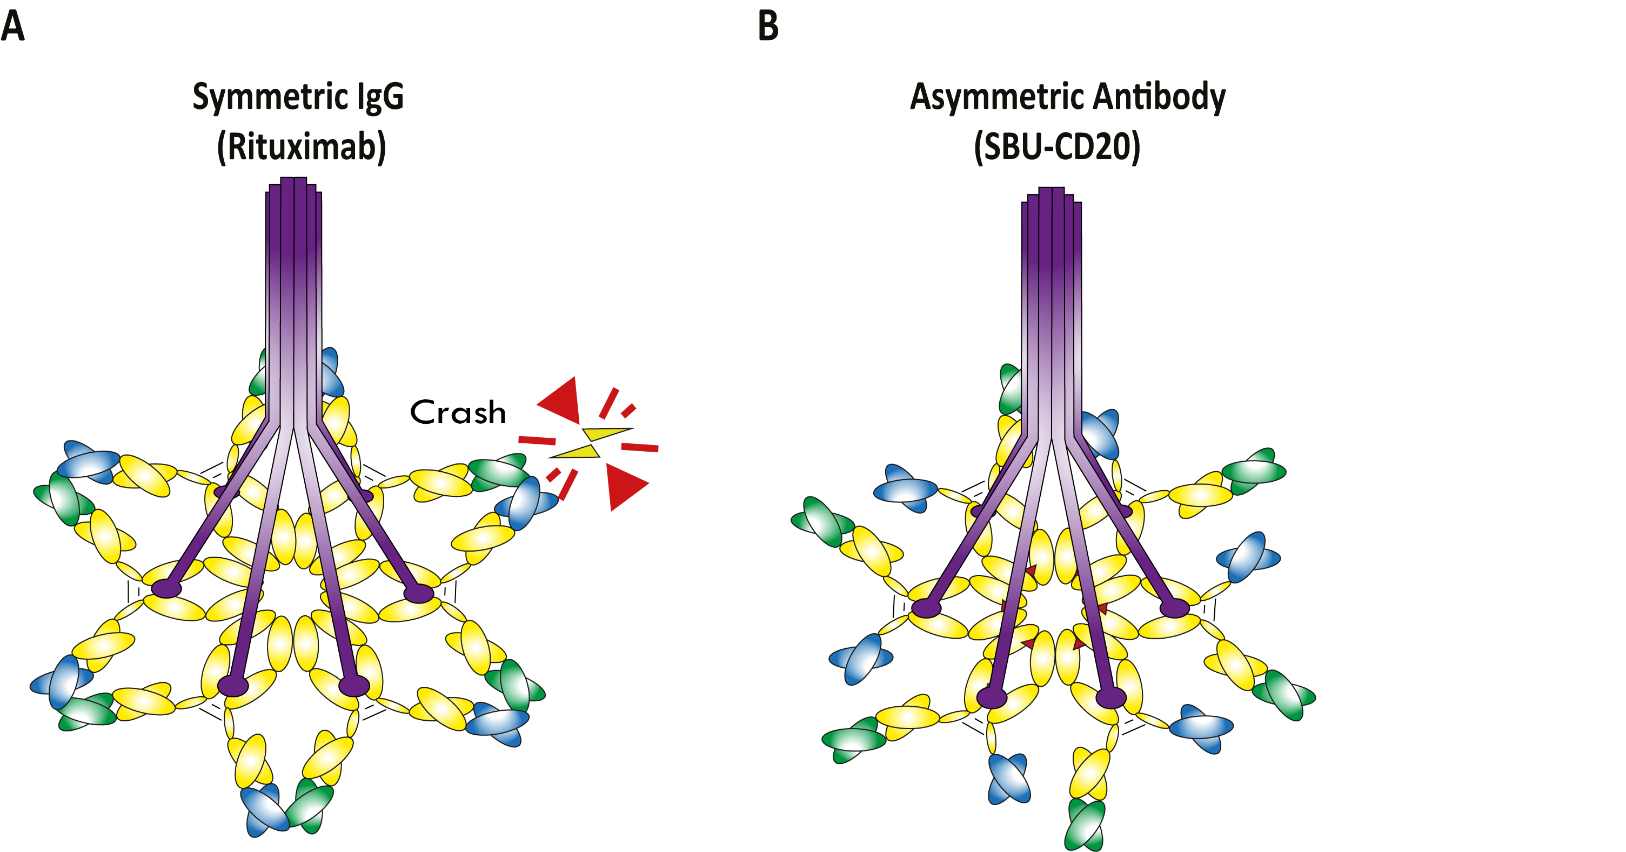


**Supplementary Fig. 10
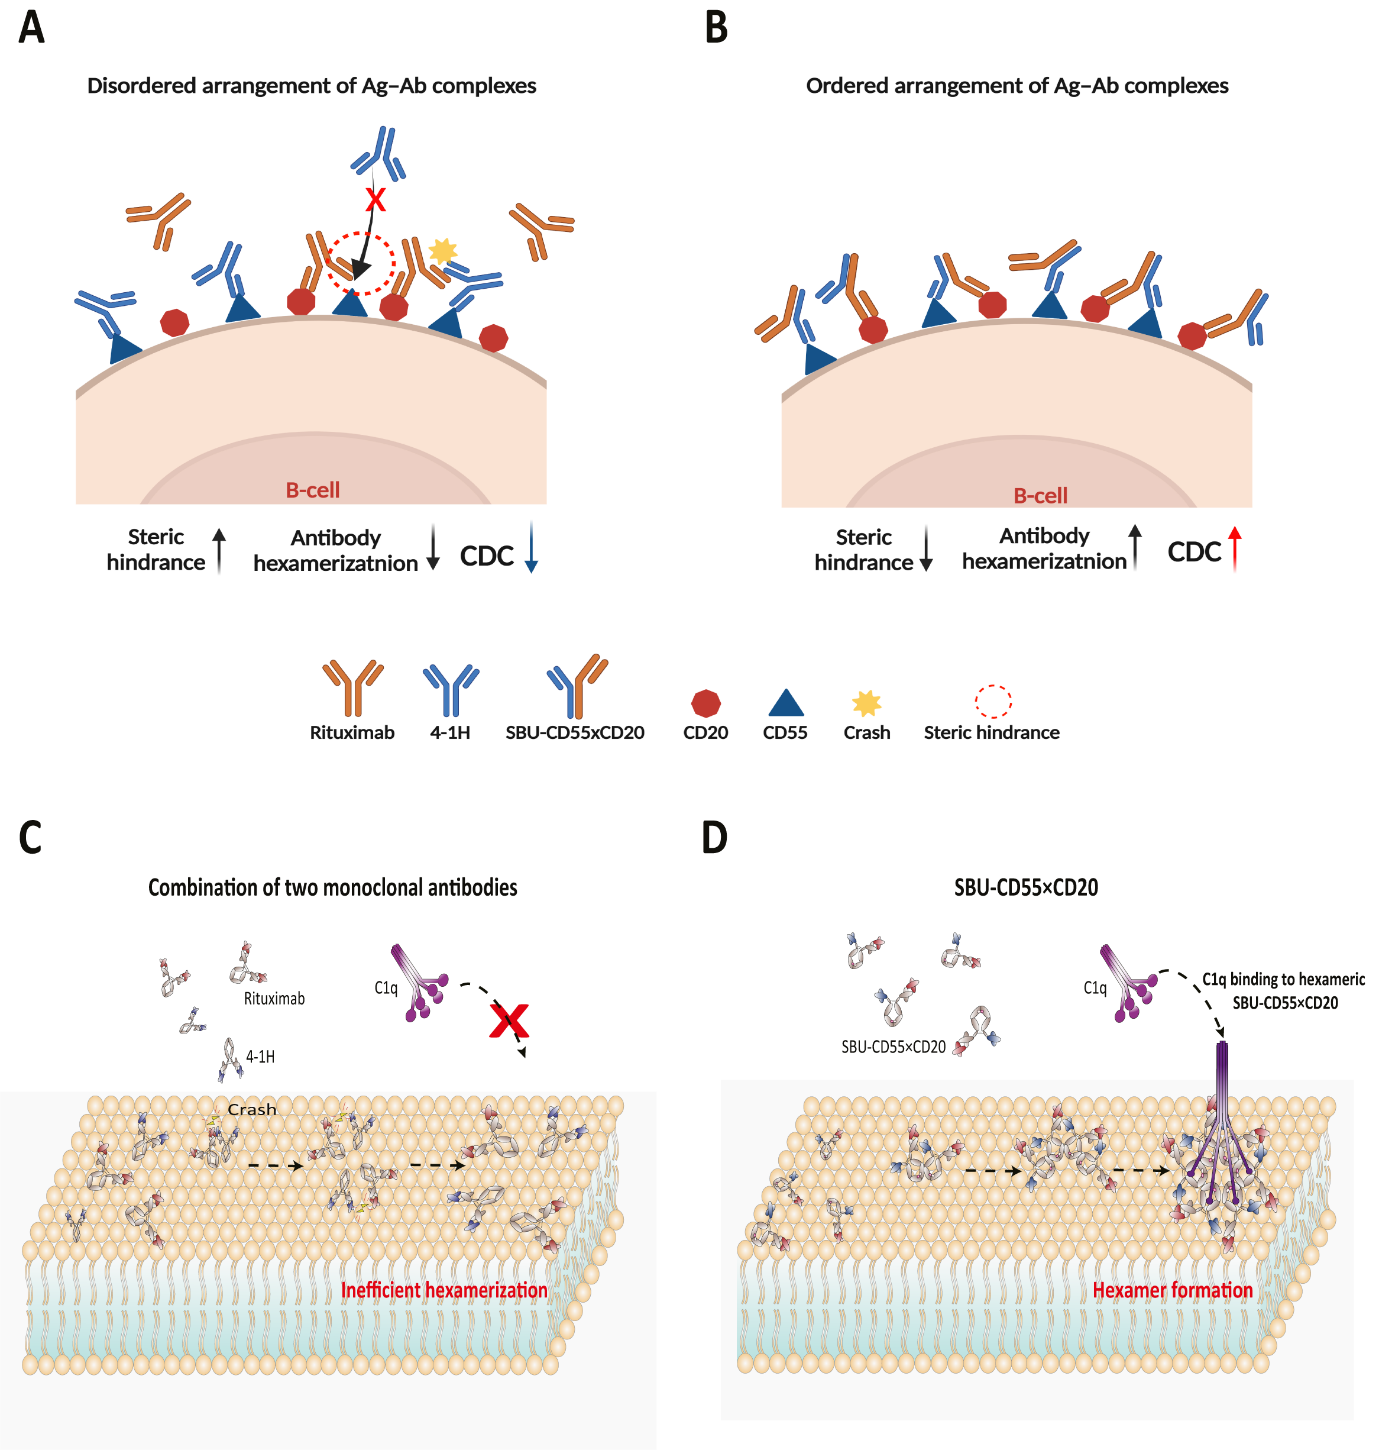
**
